# Supplementary material for: Tunable Dirac states in doped B2S3 monolayers
Source: Royal Society of Chemistry journal article supplement (doi:10.1039/d1cp05693j), 2022-01-01
Supplement: d1cp05693j1.pdf [file d1cp05693j1.pdf]

## Tunable Dirac states in doping B<sub>2</sub>S<sub>3</sub> monolayer

Xiaoteng Li,<sup>\*†1</sup> Xi Zuo,<sup>†2</sup> Bin Cui,<sup>3</sup> Wenkai Zhao,<sup>1</sup> Yuqing Xu,<sup>1</sup> Dongqing Zou,<sup>1</sup> Chuanlu Yang<sup>\*1</sup>

To discuss the rationality of the doped B<sub>2</sub>S<sub>3</sub> monolayers, we calculate their formation energies ( $\Delta E$ )<sup>1</sup> as shown in Table R1.  $\Delta E$  is defined as  $\Delta E = E(M_xB_yS_z) - xE(M) - yE(B) - zE(S)$ , ( $M = C, N, Sn$ ). It is clear that the difference between the pristine B<sub>2</sub>S<sub>3</sub> and the M-doped B<sub>2</sub>S<sub>3</sub> is pretty small, about 0.041, 0.049, and 0.039 eV, respectively. It indicates that it is reasonable for these doped configurations.

Table S1 The formation energies of B<sub>2</sub>S<sub>3</sub>, C/N/Sn-doped B<sub>2</sub>S<sub>3</sub>.

| Materials                              | Formation energy (eV/Å <sup>2</sup> ) |
|----------------------------------------|---------------------------------------|
| B <sub>2</sub> S <sub>3</sub>          | -0.076                                |
| C-doped B <sub>2</sub> S <sub>3</sub>  | -0.035                                |
| N-doped B <sub>2</sub> S <sub>3</sub>  | -0.027                                |
| Sn-doped B <sub>2</sub> S <sub>3</sub> | -0.037                                |

## References

1. X. Li, X. Zuo, H. Li, L. Han, Q. Gao, D. Li, B. Cui, D. Liu and F. Qu, *Physical chemistry chemical physics: PCCP*, 2019, **21**, 19234-19241.

<sup>1</sup> School of Physics and Optoelectronic Engineering, Ludong University, Yantai 264000, People's Republic of China

<sup>2</sup> College of Physics and Electronic Science, Hubei Normal University, Huangshi 435002, China

<sup>3</sup> School of Physics, State Key Laboratory of Crystal Materials, Shandong University, Jinan 250100, People's Republic of China

<sup>†</sup> These authors contributed equally to this work.
